# Supplementary material for: New insights into the mechanism of Schiff base synthesis from aromatic amines in the absence of acid catalyst or polar solvents
Source: PeerJ journal article supplement (doi:10.7717/peerj-ochem.4), 2020-12-15
Supplement: SI_all_data_geometries_aug-pcseg1.xls [file SI_all_data_geometries_aug-pcseg1.xls]

## Sheet: Folha2
										DSD-BLYP aug-pcseg2	DSD-BLYP aug-pcseg2	DSD-BLYP aug-pcseg2	aug-pcseg2	DSD-BLYP aug-pcseg2 solution
				E	H	G	Cv	Cp	S	in solution	no C*PT2 (gas phase)	including C*PT2 (gas phase)	C*PT2 correction	+ C*PT2 correction from gas phase
			benzaldehyde_isolated	72.693	73.286	49.154	24.768	26.755	80.939	-216066	-344.359	-344.976	-387.184	-216453
			benzaldonium_isolated	81.188	81.78	57.002	26.28	28.268	83.106	-216317	-344.759	-345.369	-382.884	-216700
			h2o	15.266	15.858	2.003	6.007	7.994	46.47	-47808.3	-76.1975	-76.3148	-73.634	-47881.9
																	E (Kcal/mol) vs. infinitely separated reactants		E (Kcal/mol) vs. corresponding pre-reactional complex
	Aniline		aniline_isolated	75.299	75.891	53.598	21.646	23.633	74.774	-179772	-286.519	-287.06	-339.865	-180112
			anilinium_isolated	85.608	86.201	63.656	22.225	24.212	75.615	-180044	-286.953	-287.491	-337.649	-180381
			PRC_aniline_benzaldehyde.out	152.405	152.998	117.017	52.894	54.882	120.68	-395889	-630.957	-632.136	-739.719	-396629			-49.3757		0
			aniline_TS	149.511	150.103	117.981	46.515	48.502	107.739	-395832	-630.862	-632.045	-742.761	-396574			6.03634		55.4121
			aniline_carbinolamine.out	153.328	153.921	119.989	50.731	52.718	113.808	-395877	-630.933	-632.108	-737.27	-396614			-31.5648		17.8109
			aniline_final_P	134.367	134.96	103.409	44.191	46.178	105.821	-348033	-554.685	-555.734	-658.481	-348692			-5.89703		43.4787
													0	0
			base_assisted_carbinolamine_formation_reactant	231.421	232.014	186.312	78.689	80.676	153.286	-575709	-917.548	-919.285	-1090.17	-576799			-91.7376		0
			base_assisted_carbinolamine_formation_TS	227.543	228.136	186.871	72.316	74.304	138.402	-575665	-917.473	-919.225	-1099.94	-576765			-57.3528		34.3848
			base_assisted_carbinolamine_formation_product	232.121	232.713	191.51	73.344	75.331	138.196	-575703	-917.536	-919.274	-1090.59	-576794			-81.3603		10.3773
			base_assisted_carbinolamine_formation_product_newer	233.264	233.857	188.86	77.821	79.809	150.921	-575712	-917.549	-919.292	-1093.5	-576805			-95.5161		-3.77849
			Base-assisted TS2	227.745	228.338	188.798	71.778	73.765	132.616	-575663	-917.47	-919.229	-1104.27	-576767			-58.0111		33.7265
			extra_protonated_aniline_carbinolamine.out	160.116	160.709	124.433	54.246	56.233	121.669	-396112	-631.311	-632.482	-734.79	-396847			-21.6384
			deprotonated_aniline_carbinolamine.out	143.477	144.07	110.336	49.57	51.558	113.142	-395537	-630.391	-631.571	-740.434	-396278			295.069
			aniline_P	143.256	143.849	111.89	45.239	47.227	107.191	-348305	-555.119	-556.162	-653.971	-348959			-264.965
			aniline_TS_protonated_pathway	158.019	158.611	126.393	47.782	49.77	108.059	-396099	-631.289	-632.467	-738.77	-396838			-10.9677	10.1164
			anilinium_Int1	162.7	163.293	129.251	50.408	52.395	114.175	-396152	-631.374	-632.548	-736.154	-396888			-58.3536
			bimolecular carbinolamine start	308.616	309.208	255.263	103.884	105.872	180.934	-791832	-1261.99	-1264.37	-1495.23	-793327	-83.9711
			bimolecular carbinolamine TS	304.739	305.331	251.734	104.025	106.012	179.765	-791798	-1261.93	-1264.33	-1505.02	-793303			20.9934
			bimolecular carbinolamine end	307.299	307.891	253.227	106.283	108.27	183.345	-791823	-1261.98	-1264.36	-1496.67	-793320			5.22098
			protonated_Int1_with extra_base	240.357	240.95	200.171	71.876	73.863	136.772	-575981	-917.981	-919.718	-1090	-577071					0
			protonated_Int1_with extra_base TS	barrier < 2 kcal.mol-1. N/D	barrier < 2 kcal.mol-1. N/D	barrier < 2 kcal.mol-1. N/D	barrier < 2 kcal.mol-1. N/D	barrier < 2 kcal.mol-1. N/D	barrier < 2 kcal.mol-1. N/D				0	0					#VALUE!
			Int1_with extra_protonated_base	241.708	242.301	197.338	77.489	79.476	150.805	-575976	-917.971	-919.707	-1089.39	-577065					3.23717
			Int1_with extra_protonated_base TS	238.227	238.82	196.929	75.097	77.084	140.503	-575968	-917.958	-919.7	-1093.29	-577061					7.08622
																proton transfer from protonated Int1 to base	5.70462
	o-toluidine		o-toluidine_isolated	94.673	95.266	70.653	28.642	30.629	82.551	-204338	-325.673	-326.299	-393.249	-204731
			PRC_o-toluidine_benzaldehyde.out	171.05	171.642	134.523	58.17	60.157	124.497	-420468	-670.131	-671.4	-796.283	-421265			-65.3636
			o-toluidine_TS	167.988	168.58	134.795	52.283	54.27	113.316	-420404	-670.025	-671.296	-797.632	-421201			-1.65067		63.713
			o-toluidine_carbinolamine.out	171.768	172.36	136.259	56.587	58.574	121.084	-420446	-670.092	-671.353	-791.578	-421237			-36.3134		29.0503
			o-toluidine_isomer_1_final_P	152.743	153.335	119.371	50.125	52.112	113.915	-372600	-593.84	-594.975	-712.102	-373312			-7.8659		57.4977
			o-toluidine_isomer_2_final_P	152.747	153.34	119.348	50.12	52.107	114.009	-372600	-593.84	-594.975	-712.11	-373312			-7.92664		57.437
													0	0
			base_assisted_carbinolamine_formation_reactant	268.879	269.472	217.723	92.054	94.041	173.566	-624858	-995.886	-997.801	-1201.52	-626060			-116.882		0
			base_assisted_carbinolamine_formation_TS	264.353	264.945	219.442	84.011	85.998	152.619	-624813	-995.807	-997.736	-1210.77	-626024			-79.074		37.8075
			base_assisted_carbinolamine_formation_product	269.057	269.65	224.987	85.292	87.279	149.799	-624856	-995.877	-997.794	-1203.35	-626059			-109.21		7.67159
			base_assisted_carbinolamine_formation_product_newer	268.974	269.566	224.803	85.326	87.314	150.137	-624859	-995.881	-997.799	-1203.85	-626062			-112.354		4.52754
			Base-assisted TS2	266.03	266.622	219.444	87.487	89.475	158.253	-624814	-995.807	-997.743	-1214.8	-626029			-84.0049		32.8766
			extra_protonated_o-toluidine_carbinolamine.out	178.518	179.11	140.633	60.106	62.094	129.053	-420706	-670.51	-671.762	-785.353	-421491			-285.524
			deprotonated_o-toluidine_carbinolamine.out	161.842	162.434	126.744	55.379	57.366	119.705	-420104	-669.546	-670.812	-794.546	-420899			292.744
			o-toluidine_P_isomer_1	161.631	162.223	127.957	51.084	53.071	114.93	-372872	-594.275	-595.402	-707.644	-373580			-267.192
			o-toluidine_P_isomer_2	161.748	162.341	128.503	50.863	52.85	113.492	-372873	-594.275	-595.403	-707.886	-373580			-267.148
			o-toluidinium_isolated	104.718	105.311	79.771	29.839	31.826	85.66	-204609	-326.107	-326.73	-390.558	-205000
			o-toluidine_protonated_Int1_isomer_1	180.47	181.063	146.889	54.242	56.229	114.618	-420728	-670.542	-671.804	-791.499	-421519			-69.0414
			o-toluidine_protonated_Int1_isomer_2	180.408	181.001	146.516	54.399	56.387	115.662	-420722	-670.534	-671.794	-790.289	-421512			-62.7744
			o-toluidine_isomer_a_TS_protonated_pathway	177.019	177.611	141.549	55.595	57.583	120.953	-420672	-670.454	-671.718	-793.291	-421465			-20.4739
			o-toluidine_isomer_b_TS_protonated_pathway	176.511	177.103	143.238	53.406	55.393	113.586	-420670	-670.451	-671.715	-793.085	-421463			-16.7584
			bimolecular carbinolamine start	345.605	346.198	288.632	115.25	117.237	193.078	-840980	-1340.32	-1342.88	-1606.22	-842586	-95.5223
			bimolecular carbinolamine TS	341.858	342.451	285.582	115.456	117.443	190.736	-840949	-1340.27	-1342.85	-1616.45	-842565			17.6545
			bimolecular carbinolamine end	344.257	344.849	286.585	117.733	119.721	195.42	-840981	-1340.33	-1342.89	-1610.05	-842591			-6.9439
			protonated_Int1_with extra_base	278.652	279.245	231.416	87.576	89.563	160.418	-625129	-996.314	-998.228	-1201.01	-626330			-135.371		-3.16618e-11
			protonated_Int1_with extra_base TS	barrier < 2 kcal.mol-1. N/D	barrier < 2 kcal.mol-1. N/D	barrier < 2 kcal.mol-1. N/D	barrier < 2 kcal.mol-1. N/D	barrier < 2 kcal.mol-1. N/D	barrier < 2 kcal.mol-1. N/D				0	0			barrier < 2 kcal.mol-1. N/D		#VALUE!
			Int1_with extra_protonated_base	277.427	278.02	230.375	86.972	88.959	159.8	-625116	-996.293	-998.205	-1199.98	-626316			-122.443		13.969
			Int1_with extra_protonated_base TS	275.717	276.309	228.181	88.689	90.676	161.423	-625108	-996.277	-998.194	-1203.42	-626311			-119.213		19.3935
																	-28.7895
																proton transfer from protonated Int1 to base	11.4
	m-toluidine		m-toluidine_isolated	94.123	94.715	70.718	26.725	28.713	80.486	-204336	-325.671	-326.296	-392.274	-204729
			PRC_m-toluidine_benzaldehyde.out	170.877	171.469	133.179	58.562	60.549	128.425	-420467	-670.129	-671.397	-795.569	-421262			-67.0941		0
			m-toluidine_TS	167.963	168.555	134.136	52.416	54.403	115.442	-420397	-670.015	-671.283	-795.642	-421193			3.48934		70.5834
			m-toluidine_carbinolamine.out	171.777	172.37	135.779	56.625	58.612	122.726	-420441	-670.085	-671.344	-789.834	-421231			-33.2592		33.8349
			m-toluidine_isomer_1_final_P	152.775	153.367	119.207	50.128	52.115	114.574	-372598	-593.837	-594.97	-711.052	-373309			-7.38021		59.7139
			m-toluidine_isomer_2_final_P	152.115	152.708	120.062	48.201	50.188	109.496	-372598	-593.838	-594.972	-711.258	-373310			-7.43147		59.6626
													0	0
			base_assisted_carbinolamine_formation_reactant	267.628	268.221	218.438	88.666	90.653	166.973	-624846	-995.867	-997.776	-1197.51	-626043			-104.867		0
			base_assisted_carbinolamine_formation_TS	263.566	264.159	218.735	82.532	84.52	152.353	-624799	-995.783	-997.705	-1206.06	-626005			-66.1058		38.7607
			base_assisted_carbinolamine_formation_product	268.145	268.737	223.597	83.984	85.971	151.4	-624852	-995.872	-997.787	-1201.52	-626054			-110.454		-5.58716
			Base-assisted TS2	265.099	265.692	218.395	85.852	87.839	158.634	-624793	-995.776	-997.704	-1209.96	-626003			-65.11		39.7565
			extra_protonated_m-toluidine_carbinolamine.out	178.491	179.084	140.129	60.287	62.274	130.653	-420702	-670.506	-671.755	-784.138	-421486			-284.283
			deprotonated_m-toluidine_carbinolamine.out	161.846	162.439	126.16	55.541	57.528	121.68	-624799	-995.783	-997.705	-1206.06	-626005			-204817
			m-toluidine_P_isomer_1	161.649	162.241	127.648	51.205	53.192	116.025	-372870	-594.272	-595.398	-706.755	-373577			-267.222
			m-toluidine_P_isomer_2	161.565	162.158	127.612	51.292	53.279	115.867	-372870	-594.272	-595.399	-706.838	-373577			-267.591
			m-toluidinium_isolated	103.562	104.155	80.313	25.89	27.877	79.966	-204607	-326.104	-326.725	-389.996	-204997
			m-toluidine_protonated_Int1_isomer_1	180.468	181.061	145.537	54.452	56.439	119.145	-420720	-670.531	-671.79	-789.66	-421509			-63.4445
			m-toluidine_protonated_Int1_isomer_2	181.084	181.677	145.01	56.463	58.451	122.981	-420718	-670.529	-671.786	-789.15	-421507			-61.8618
			m-toluidine_isomer_a_TS_protonated_pathway	176.479	177.071	142.432	53.663	55.651	116.18	-420674	-670.458	-671.823	-856.794	-421531			-87.8942
			bimolecular carbinolamine start	343.442	344.035	290.362	110.116	112.103	180.02	-840964	-1340.3	-1342.85	-1601.96	-842566	-85.4513
			bimolecular carbinolamine TS	340.902	341.494	285.174	114.03	116.017	188.898	-840942	-1340.26	-1342.83	-1613.66	-842556			5.18732
			bimolecular carbinolamine end	344.067	344.66	284.861	118.265	120.252	200.567	-840968	-1340.31	-1342.86	-1605.26	-842573			-12.2132
			protonated_Int1_with extra_base	276.526	277.118	232.037	82.133	84.12	151.204	-625121	-996.303	-998.211	-1197.78	-626319					0
			protonated_Int1_with extra_base TS	barrier < 2 kcal.mol-1. N/D	barrier < 2 kcal.mol-1. N/D	barrier < 2 kcal.mol-1. N/D	barrier < 2 kcal.mol-1. N/D	barrier < 2 kcal.mol-1. N/D	barrier < 2 kcal.mol-1. N/D				0	0					#VALUE!
			Int1_with extra_protonated_base	277.24	277.833	230.303	85.599	87.586	159.414	-625115	-996.292	-998.2	-1197.14	-626312					5.01523
			Int1_with extra_protonated_base TS	274.334	274.927	229.22	85.207	87.194	153.301	-625102	-996.27	-998.182	-1200.12	-626302					14.6426
																proton transfer from protonated Int1 to base	9.78072
	p-toluidine		p-toluidine_isolated	93.958	94.551	70.443	26.918	28.905	80.859	-204335	-325.668	-326.294	-392.564	-204727
			PRC_p-toluidine_benzaldehyde.out	170.167	170.759	133.861	56.655	58.642	123.756	-420460	-670.119	-671.385	-794.79	-421255			-60.0579		0
			p-toluidine_TS	168.544	169.136	132.799	54.407	56.395	121.877	-420396	-670.014	-671.282	-795.524	-421192			1.95635		62.0143
			p-toluidine_carbinolamine.out	171.151	171.743	136.445	54.673	56.66	118.393	-420440	-670.083	-671.342	-790.004	-421230			-32.5479		27.51
			p-toluidine_final_P	152.157	152.749	119.848	48.201	50.189	110.353	-372598	-593.837	-594.971	-711.221	-373309			-7.96298		52.0949
			base_assisted_carbinolamine_formation_reactant	266.778	267.371	218.734	86.927	88.914	163.13	-624840	-995.855	-997.763	-1197.05	-626037				computed from the respective PRC	0
			base_assisted_carbinolamine_formation_TS	263.08	263.672	219.662	80.399	82.386	147.613	-624795	-995.778	-997.699	-1205.72	-626001					37.1047
			base_assisted_carbinolamine_formation_product	269.319	269.911	221.187	87.913	89.901	163.423	-624848	-995.865	-997.779	-1201.14	-626049					-9.79358
			Base-assisted TS2	265.024	265.616	218.382	85.946	87.933	158.426	-624794	-995.776	-997.706	-1210.68	-626004					31.9862
			extra_protonated_p-toluidine_carbinolamine.out	177.841	178.434	140.663	58.374	60.361	126.682	-420703	-670.507	-671.757	-784.392	-421487			-285.608
			deprotonated_p-toluidine_carbinolamine.out	161.207	161.799	126.767	53.529	55.516	117.497	-420099	-669.538	-670.802	-793.023	-420892			#REF!
			p-toluidine_P	161.008	161.601	128.246	49.31	51.297	111.873	-372870	-594.272	-595.398	-706.798	-373577			-267.562
			p-toluidinium_isolated	103.43	104.023	80.113	26.015	28.002	80.195	-204609	-326.106	-326.728	-390.191	-204999
			p-toluidine_protonated_Int1	180.346	180.939	145.409	54.528	56.515	119.168	-420718	-670.529	-671.786	-789.072	-421507			-62.2396
			p-toluidine_TS_protonated_pathway	177.041	177.634	141.103	55.707	57.694	122.525	-420664	-670.441	-671.702	-791.327	-421455			-14.2305
			bimolecular carbinolamine start	344.034	344.626	288.304	111.856	113.843	188.904	-840966	-1340.3	-1342.85	-1602.75	-842568	-92.8275
			bimolecular carbinolamine TS	340.152	340.745	284.321	112.187	114.174	189.246	-840933	-1340.25	-1342.82	-1612.77	-842546			18.2743
			bimolecular carbinolamine end	342.733	343.325	286.033	114.383	116.37	192.16	-840966	-1340.3	-1342.86	-1606.48	-842572			-6.17035
			protonated_Int1_with extra_base	276.362	276.954	231.681	82.129	84.116	151.848	-625113	-996.289	-998.196	-1196.37	-626309					0
			protonated_Int1_with extra_base TS	barrier < 2 kcal.mol-1. N/D	barrier < 2 kcal.mol-1. N/D	barrier < 2 kcal.mol-1. N/D	barrier < 2 kcal.mol-1. N/D	barrier < 2 kcal.mol-1. N/D	barrier < 2 kcal.mol-1. N/D				0	0					#VALUE!
			Int1_with extra_protonated_base	276.552	277.145	231.466	83.697	85.684	153.206	-625111	-996.286	-998.193	-1196.93	-626308					0.802758
			Int1_with extra_protonated_base TS	274.251	274.843	228.989	85.282	87.269	153.796	-625098	-996.266	-998.178	-1200.01	-626298					8.57717
			P with extra base
																proton transfer from protonated Int1 to base	6.3473
