# Supplementary material for: New insights into the mechanism of Schiff base synthesis from aromatic amines in the absence of acid catalyst or polar solvents
Source: PeerJ journal article supplement (doi:10.7717/peerj-ochem.4), 2020-12-15
Supplement: SI_auto-protolysis_of_bases_geometries_aug-pcseg1.xlsx [file SI_auto-protolysis_of_bases_geometries_aug-pcseg1.xlsx]

## Sheet: Folha1
				E	H	G	Cv	Cp	S	solution energies	DSD-BLYP DFT	DSD-BLYP DFT+C*PT2	total energy in solution				Auto-protolysis energies
													0
	z1	aniline	two molecules of base	155.094	155.686	122.159	49.123	51.11	112.451	-359582	-573.095	-574.191	-360270
	z2	aniline	four molecules of base	315.814	316.406	257.507	107.831	109.819	197.549	-719260	-1146.34	-1148.57	-720660				82.234
	z3	aniline	deprotonated base solvated with one extra base	145.56	146.152	112.757	48.438	50.426	112.008	-359229	-572.532	-573.633	-359920
	z4	aniline	protonated base solvated with three extra bases	324.544	325.137	272.062	102.704	104.692	178.014	-719537	-1146.78	-1149.01	-720933
	z5												0
	z6	o-toluidine	two molecules of base	193.045	193.638	156.379	61.306	63.293	124.965	-408722	-651.416	-652.685	-409519
	z7	o-toluidine	four molecules of base	389.064	389.657	327.633	128.95	130.937	208.031	-817561	-1303.01	-1305.6	-819183				80.7466
	z8	o-toluidine	deprotonated base solvated with one extra base	182.649	183.242	146.277	59.622	61.61	123.98	-408362	-650.841	-652.113	-409160
	z9	o-toluidine	protonated base solvated with three extra bases	398.927	399.52	337.102	128.166	130.153	209.35	-817840	-1303.46	-1306.04	-819460
	z10												0
	z11	m-toluidine	two molecules of base	192.152	192.744	155.927	59.751	61.738	123.485	-408733	-651.437	-652.711	-409533
	z12	m-toluidine	four molecules of base	388.109	388.701	324.945	127.797	129.784	213.839	-817530	-1302.97	-1305.54	-819143				106.081
	z13	m-toluidine	deprotonated base solvated with one extra base	182.656	183.249	146.271	59.596	61.583	124.025	-408362	-650.841	-652.113	-409160
	z14	m-toluidine	protonated base solvated with three extra bases	395.951	396.544	337.117	121.193	123.18	199.318	-817802	-1303.4	-1305.97	-819413
	z15												0
	z16	p-toluidine	two molecules of base	191.827	192.42	153.159	61.085	63.072	131.68	-408711	-651.399	-652.665	-409505
	z17	p-toluidine	four molecules of base	386.695	387.288	325.201	124.013	126.001	208.24	-817519	-1302.95	-1305.52	-819132				83.3571
	z18	p-toluidine	deprotonated base solvated with one extra base	181.629	182.222	144.826	58.176	60.163	125.425	-408352	-650.828	-652.096	-409149
	z19	p-toluidine	protonated base solvated with three extra bases	397.131	397.723	336.15	125.15	127.137	206.516	-817797	-1303.39	-1305.96	-819407
													0
													0
		nitromethane	neutral	142.405	142.997	93.491	64.582	66.569	166.043	-613333	-977.463	-979.137	-614384
		nitromethane	protonated	147.457	148.049	102.587	59.059	61.046	152.481	-613573	-977.847	-979.514	-614619				105.891
		nitromethane	deprotonated	132.997	133.589	84.625	63.41	65.397	164.226	-612997	-976.927	-978.594	-614043
													0
		acetonitrile	neutral	127.363	127.956	84.387	54.598	56.586	146.13	-332153	-529.37	-530.389	-332793
		acetonitrile	protonated	131.94	132.533	93.505	48.805	50.792	130.898	-332399	-529.761	-530.772	-333033				95.7801
		acetonitrile	deprotonated	118.774	119.366	74.283	57.82	59.807	151.21	-331813	-528.826	-529.849	-332455
													0
		ethylene carbonate	neutral	207.691	208.283	154.959	79.973	81.96	178.85	-857144	-1366.03	-1368.29	-858565
		ethylene carbonate	protonated	214.64	215.232	161.072	81.915	83.902	181.653	-857416	-1366.46	-1368.72	-858836				88.1724
		ethylene carbonate	deprotonated	197.963	198.555	143.146	81.793	83.78	185.842	-856778	-1365.44	-1367.71	-858201
		methylamine	two molecules of base	86.92	87.512	60.708	24.21	26.197	89.902	-119789	-190.931	-191.309	-120026
		methylamine	four molecules of base	175.22	175.813	133.186	52.379	54.366	142.972	-239626	-381.937	-382.704	-240107				100.879
		methylamine	deprotonated base solvated with one extra base	75.073	75.666	50.252	22.914	24.901	85.238	-119417	-190.336	-190.72	-119658
		methylamine	protonated base solvated with three extra bases	184.378	184.97	143.612	51.397	53.384	138.715	-239895	-382.364	-383.129	-240375
													0
		ethylamine	two molecules of base	123.664	124.256	95.879	31.655	33.642	95.178	-168921	-269.241	-269.784	-169262
		ethylamine	four molecules of base	249.43	250.023	203.466	68.6	70.587	156.153	-337887	-538.551	-539.651	-338577				85.1471
		ethylamine	deprotonated base solvated with one extra base	112.917	113.509	84.435	32.397	34.384	97.515	-168544	-268.638	-269.187	-168889
		ethylamine	protonated base solvated with three extra bases	257.88	258.472	213.976	66.463	68.45	149.241	-338174	-539.007	-540.106	-338864
													0
		ethenamine	two molecules of base	92.416	93.009	67.161	26.908	28.896	86.694	-167424	-266.849	-267.359	-167744
		ethenamine	four molecules of base	189.477	190.07	146.795	65.868	67.855	145.143	-334912	-533.794	-534.835	-335566				72.5088
		ethenamine	deprotonated base solvated with one extra base	82.39	82.982	56.412	27.653	29.64	89.118	-167075	-266.29	-266.806	-167399
		ethenamine	protonated base solvated with three extra bases	196.962	197.554	157.231	60.393	62.381	135.245	-335187	-534.233	-535.272	-335838
													0
		ethynylamine	two molecules of base	62.509	63.102	35.917	30.413	32.4	91.179	-165903	-264.417	-264.902	-166207
		ethynylamine	four molecules of base	125.051	125.644	88.374	57.793	59.78	125.003	-331841	-528.886	-529.871	-332459				69.3664
		ethynylamine	deprotonated base solvated with one extra base	51.352	51.944	27.1	24.448	26.435	83.327	-165564	-263.877	-264.366	-165871
		ethynylamine	protonated base solvated with three extra bases	130.813	131.406	92.966	56.269	58.256	128.926	-332111	-529.322	-530.295	-332721
