# Supplementary material for: New insights into the mechanism of Schiff base synthesis from aromatic amines in the absence of acid catalyst or polar solvents
Source: PeerJ journal article supplement (doi:10.7717/peerj-ochem.4), 2020-12-15
Supplement: SI_protonated_mechanism_geometries_aug-pcseg1.xls [file SI_protonated_mechanism_geometries_aug-pcseg1.xls]

## Sheet: zz
		E	H	G	Cv	Cp	S		SP BLYP solution (kcal/mol)	SP BLYP gas (Ha)	SP DSD-BLYP gas (Ha)	SP BLYP solution + G correction	SP DSD-BLYP solution + G correction	BLYP relative energies (kcal/mol)	DSD-BLYP relative energies (kcal/mol)	diff betwee BLYP and DSD-BLYP
1	methylamine_start_approach_b	135.16	135.753	99.698	40.123	42.11	120.927		-216271	-344.703	-345.345	-216171	-216574	0	0	0
2	methylamine_TS1_approach_b	134.171	134.763	101.097	36.79	38.777	112.918		-216272	-344.706	-345.346	-216171	-216573	-0.041	0.737544	0.778544
	methylamine Int0	136.994	137.586	105.661	38.169	40.156	107.078		-216289	-344.73	-345.376	-216184	-216589	-12.847	-15.3926	-2.54561
3	methylamine_Int1	136.258	136.85	105.655	38.064	40.052	104.63		-216299	-344.745	-345.395	-216194	-216601	-22.673	-27.6876	-5.01461
4	methylamine_TS2_new_opt.out:	133.433	134.025	102.506	37.438	39.425	105.717		-216282	-344.717	-345.37	-216179	-216589	-8.142	-15.0622	-6.92018
5	methylamine_prod	135.091	135.684	100.335	41.475	43.463	118.561		-216278	-344.714	-345.357	-216177	-216581	-6.533	-7.45705	-0.924049
1	ethylamine_start_approach_b	169.988	170.58	137.402	41.863	43.85	111.28		-265397	-423.003	-423.808	-265259	-265765	0	0	0
2	ethylamine_TS1_approach_b	171.38	171.973	133.206	46.463	48.45	130.024		-265397	-423.004	-423.808	-265264	-265768	-4.306	-3.3764	0.929599
3	ethylamine_Int0.out:	172.707	173.299	141.116	42.039	44.026	107.942		-265423	-423.042	-423.855	-265282	-265793	-22.786	-27.7387	-4.95268
	ethylamine_Int1	173.682	174.275	139.408	47.626	49.613	116.943		-265427	-423.047	-423.861	-265287	-265798	-27.744	-33.3317	-5.58767
4	ethylamine_TS2_new_opt.out:	170.788	171.38	136.382	46.975	48.962	117.385		-265409	-423.02	-423.837	-265273	-265786	-13.3	-20.9271	-7.62714
5	ethylamine_prod.out:	171.767	172.359	134.871	49.153	51.14	125.735		-265404	-423.013	-423.82	-265269	-265775	-9.421	-10.2718	-0.850756
1	ethenylamine_start_from_TS_approach_b.out:	140.564	141.157	105.866	44.641	46.628	118.368		-263907	-420.622	-421.401	-263802	-264290		0
2	ethenylamine_TS1_approach_b.out:	140.476	141.069	106.453	43.338	45.325	116.101		-263906	-420.619	-421.401	-263800	-264290	1.847	0.189263	-1.65774
	ethenylamine_Int0	142.976	143.568	110.371	43.595	45.582	111.343		-263933	-420.66	-421.445	-263822	-264315	-20.645	-24.9367	-4.29167
3	ethenylamine_Int1_from_TS_approach_b.out:	143.418	144.011	110.441	43.345	45.332	112.592		-263931	-420.659	-421.442	-263821	-264313	-19.365	-22.7269	-3.36186
	ethenylamine real Int1	142.486	143.079	111.681	42.009	43.996	105.309		-263932	-420.656	-421.442	-263820	-264313	-18.455	-22.8049	-4.34995
4	ethenylamine_TS2_new_opt.out:	140.092	140.684	109.421	41.303	43.29	104.858		-263915	-420.633	-421.42	-263806	-264299	-4.385	-9.25221	-4.86721
5	ethenylamine_prod.out:	141.895	142.488	106.084	48.212	50.2	122.098		-263917	-420.637	-421.415	-263811	-264299	-8.982	-8.51312	0.468882
1	ethynylamine_start.out:	Spontaneously collapses into Int0											Spontaneously collapses into Int1
2	ethynylamine_TS1.out:	108.743	109.335	79.624	37.833	39.82	99.653		-262368	-418.162	-418.916	-262289	-262762	0	0	0
3	ethynylamine_Int0.out:	111.219	111.812	82.025	38.294	40.281	99.904		-262380	-418.18	-418.936	-262298	-262772	-9.149	-10.3037	-1.15469
3	ethynylamine_Int1.out:	110.821	111.414	81.208	40.178	42.165	101.31		-262380	-418.178	-418.936	-262299	-262774	-10.226	-12.6478	-2.42182
4	ethynylamine_TS2_new_opt.out:	110.554	111.147	79.281	42.436	44.423	106.878		-262377	-418.176	-418.934	-262298	-262774	-9.473	-11.7877	-2.31473
5	ethynylamine_prod.out:	110.237	110.829	76.873	45.313	47.3	113.888		-262375	-418.174	-418.925	-262298	-262770	-9.661	-7.73099	1.93001
1	aniline_start	205.229	205.822	163.545	67.019	69.006	141.797		-456082	-726.895	-728.265	-455919	-456779	0	0	0
2	aniline_TS1	203.354	203.947	164.73	63.34	65.327	131.533		-456078	-726.887	-728.266	-455914	-456779	5.095	-0.97865	-6.07365
	aniline Int0	205.443	206.036	168.932	61.261	63.248	124.445		-456092	-726.909	-728.284	-455924	-456786	-4.703	-7.43146	-2.72846
3	aniline_new_mechanism_Int1.out:	206.861	207.453	167.538	64.602	66.589	133.875		-456093	-726.909	-728.285	-455925	-456788	-6.627	-9.8293	-3.2023
4	aniline_new_mechanism_TS2_new_opt_freq.out:	203.556	204.148	165.047	63.716	65.703	131.146		-456083	-726.893	-728.274	-455918	-456784	1.242	-5.3522	-6.5942
5	aniline_new_mechanism_prod.out:	205.206	205.799	164.477	68.432	70.419	138.594		-456093	-726.911	-728.284	-455928	-456790	-9.528	-11.3893	-1.86127
1	m-toluidine_new_mechanism_start_new_opt.out:	241.961	242.553	194.633	79.13	81.117	160.726		-505213	-805.201	-806.74	-505018	-505983	0	0
2	m-toluidine_new_mechanism_TS1_new_opt.out:	239.452	240.045	196.926	73.434	75.422	144.621		-505210	-805.195	-806.745	-505013	-505985	4.843	-1.84196	-6.68496
	m-toluidine Int0	242.524	243.116	198.522	74.524	76.511	149.57		-505237	-805.239	-806.789	-505039	-506011	-20.921	-27.7776	-6.85661
3	m-toluidine_new_mechanism_Int1_new_opt.out:	242.347	242.94	201.749	72.644	74.631	138.156		-505233	-805.231	-806.777	-505032	-506002	-13.654	-18.7911	-5.13712
4	m-toluidine_new_mechanism_TS2_new_opt.out:	239.356	239.949	197.96	74.04	76.028	140.83		-505224	-805.22	-806.773	-505026	-506001	-8.223	-17.2966	-9.07361
5	m-toluidine_new_mechanism_prod.out:	241.352	241.945	197.25	78.489	80.476	149.905		-505235	-805.237	-806.783	-505038	-506008	-20.113	-24.4435	-4.33051
1	o-toluidine_new_mechanism_start_new_opt.out:	242.013	242.605	195.895	78.87	80.857	156.667		-505224	-805.22	-806.763	-505028	-505997	0	0
2	o-toluidine_new_mechanism_TS1_new_opt.out:	240.172	240.764	197.332	75.012	76.999	145.672		-505223	-805.214	-806.768	-505026	-506001	2.557	-4.24942	-6.80642
	o-toluidine Int0	242.356	242.949	202	72.994	74.982	137.342		-505246	-805.253	-806.805	-505044	-506018	-15.675	-21.5005	-5.82547
3	o-toluidine_new_mechanism_Int1.out:	243.345	243.937	199.898	77.102	79.089	147.71		-505246	-805.25	-806.803	-505046	-506020	-17.857	-23.6953	-5.83827
4	o-toluidine_new_mechanism_TS2_new_opt.out:	240.275	240.868	197.62	75.695	77.682	145.055		-505233	-805.23	-806.787	-505035	-506012	-6.695	-15.4442	-8.74922
5	o-toluidine_new_mechanism_product.out:	241.469	242.061	197.893	78.221	80.208	148.141		-505242	-805.248	-806.797	-505044	-506016	-15.752	-19.3718	-3.61983
1	p-toluidine_new_mechanism_start_new_opt.out:	240.163	240.756	197.822	73.136	75.123	144.001		-505218	-805.209	-806.75	-505020	-505987	0	0
2	p-toluidine_new_mechanism_TS1_new_opt.out:	239.513	240.105	196.989	73.289	75.277	144.613		-505217	-805.206	-806.758	-505020	-505993	0.187	-6.40173	-6.58873
	p-toluidine Int0	241.505	242.097	200.916	71.506	73.494	138.124		-505226	-805.221	-806.766	-505025	-505994	-5.166	-7.66015	-2.49415
3	p-toluidine_new_mechanism_Int1_new_opt.out:	242.77	243.363	199.314	74.875	76.862	147.741		-505224	-805.216	-806.76	-505025	-505994	-4.868	-6.97349	-2.10549
4	p-toluidine_new_mechanism_TS2_new_opt.out:	239.344	239.937	197.743	74.112	76.099	141.518		-505216	-805.205	-806.757	-505018	-505992	1.531	-5.11047	-6.64147
5	p-toluidine_new_mechanism_prod_new_opt.out:	241.866	242.458	195.777	80.643	82.63	156.569		-505226	-805.223	-806.767	-505031	-505999	-10.715	-12.3172	-1.60218
	aniline_proton_transfer_start.out	205.433	206.026	167.697	60.712	62.699	128.553		-456087	-726.902	-728.274	-455919	-456780	0	0	0
	aniline_proton_transfer_TS.out	204.424	205.016	166.467	62.214	64.202	129.29		-456088	-726.903	-728.281	-455921	-456786	-2.22	-6.01398	-3.79398
aniline	proton_transfer end	nowhere
	proton_transfer start	243.482	244.074	199.967	76.064	78.051	147.937		-505239	-805.241	-806.79	-505039	-506011	0	0	0
o-toluidine	proton_transfer TS	comp07										0	0	505039	506011	972.397
	proton_transfer end	collapses into proton_transfer_start
	proton_transfer start	242.228	242.82	199.902	72.508	74.495	143.948		-505222	-805.216	-806.758	-505022	-505990	0	0	0
m-toluidine	proton_transfer TS	240.432	241.025	198.163	72.496	74.484	143.76		-505223	-805.217	-806.765	-505025	-505997	-2.889	-6.54262	-3.65362
	proton_transfer end	comp08	258.905	216.486	69.107	71.094	142.275
	proton_transfer start	243.315	243.907	198.685	76.552	78.539	151.677		-505228	-805.226	-806.773	-505029	-506000	0	0	0
p-toluidine	proton_transfer TS	240.618	241.211	199.219	72.35	74.337	140.839		-505220	-805.211	-806.759	-505020	-505991	8.924	8.71076	-0.213238
	proton_transfer end	collapses into proton_transfer_start
	methylamine_proton_transfer_start.out	136.402	136.994	106.177	37.342	39.329	103.361		-216306	-344.756	-345.407	-216200	-216608	0	0	0
	methylamine_proton_transfer_TS.out	134.2	134.793	105.312	36.112	38.099	98.879		-216307	-344.757	-345.412	-216202	-216613	-1.875	-4.26277	-2.38777
	end	136.552	137.144	107.307	36.85	38.837	100.073		-216309	-344.76	-345.412	-216202	-216611	-1.8	-2.96078
	ethylamine_proton_transfer_start.out	173.221	173.813	139.136	46.86	48.847	116.307		-265440	-423.067	-423.886	-265300	-265814	0	0	0
	ethylamine_proton_transfer_TS.out	171.405	171.997	138.021	45.942	47.929	113.956		-265438	-423.065	-423.885	-265300	-265815	0.315	-0.82543	-1.14043
	end	173.922	174.515	140.45	46.587	48.574	114.253		-265440	-423.068	-423.885	-265300	-265813	0.814	1.11263
	ethenylamine_proton_transfer_start.out	143.324	143.917	109.933	43.655	45.642	113.981		-263932	-420.659	-421.443	-263822	-264314	0	0	0
	ethenylamine_proton_transfer_TS.out	140.695	141.287	108.501	42.372	44.359	109.965		-263928	-420.652	-421.44	-263819	-264314	2.568	0.22472	-2.34328
	end	142.911	143.504	112.339	41.38	43.367	104.526		-263930	-420.654	-421.439	-263817	-264310	4.526	4.13116
	ethynylamine_proton_transfer_start.out	112.011	112.604	80.162	41.884	43.871	108.81		-262384	-418.187	-418.944	-262304	-262779	0	0	0
	ethynylamine_proton_transfer_TS.out	109.766	110.358	79.197	40.535	42.522	104.515		-262383	-418.183	-418.944	-262303	-262781	0.645	-1.46652	-2.11152
	end	110.919	111.511	81.034	39.654	41.642	102.222		-262384	-418.185	-418.944	-262303	-262779	1.452	0.0431169

## Sheet: Folha1
			methyl	ethyl	ethenyl	ethynyl	aniline	m-toluidine	o-toluidine	p-toluidine
		start_approach_b	0	0	0		0	0	0	0
		TS1_approach_b	0.74	-3.38	0.19	0	-0.98	-1.84196	-4.24942	-6.40173
		Int0	-15.39	-27.74	-24.94	-10.3	-7.43	-27.7776	-21.5005	-7.66015
		Int1	-27.69	-33.33	-22.8	-12.65	-9.83	-18.7911	-23.6953	-6.97349
		TS2_new_opt.out:	-15.06	-20.93	-9.25	-11.79	-5.35	-17.2966	-15.4442	-5.11047
		prod	-7.46	-10.27	-8.51	-7.73	-11.39	-24.4435	-19.3718	-12.3172
		0.1
			methyl	ethyl	ethenyl	ethynyl	aniline	m-toluidine	o-toluidine	p-toluidine
		0	0	0	0		0	0	0	0
		1	0	0	0		0	0	0	0
		1.1	0.74	-3.38	0.19	0	-0.98	-1.84196	-4.24942	-6.40173
		2.1	0.74	-3.38	0.19	0	-0.98	-1.84196	-4.24942	-6.40173
		3.1	-15.39	-27.74	-24.94	-10.3	-7.43	-27.7776	-21.5005	-7.66015
		4.1	-15.39	-27.74	-24.94	-10.3	-7.43	-27.7776	-21.5005	-7.66015
		5.1	-27.69	-33.33	-22.8	-12.65	-9.83	-18.7911	-23.6953	-6.97349
		6.1	-27.69	-33.33	-22.8	-12.65	-9.83	-18.7911	-23.6953	-6.97349
		7.1	-15.06	-20.93	-9.25	-11.79	-5.35	-17.2966	-15.4442	-5.11047
		8.1	-15.06	-20.93	-9.25	-11.79	-5.35	-17.2966	-15.4442	-5.11047
		9.1	-7.46	-10.27	-8.51	-7.73	-11.39	-24.4435	-19.3718	-12.3172
		10.1	-7.46	-10.27	-8.51	-7.73	-11.39	-24.4435	-19.3718	-12.3172
